# Supplementary material
Source: publisher site journal article supplement (https://oneecosystem.pensoft.net/article/download/suppl/6888609/)
Supplement: Supplementary file 1

## Sheet: Irish national typology
Category	Habitat	Sub-habitat
Level 1	Level 2	Level 3
F Freshwater	FL Lakes and Ponds	FL1 Dystrophic lakes
		FL2 Acidic oligotrophic lakes
		FL3 Limestone/marl lakes
		FL4 Mesotrophic lakes
		FL5 Eutrophic lakes
		FL6 Turloughs
		FL7 Reservoirs
		FL8 Other artificial lakes and ponds
	FW Watercourses	FW1 Eroding/upland rivers
		FW2 Depositing/lowland rivers
		FW3 Canals
		FW4 Drainage ditches
	FP Springs	FP1 Calcareous springs
		FP2 Non-Calcareous springs
	FS Swamps	FS1 Reed and large sedge swamps
		FS2 Tall herb swamps
G Grassland and Marsh	GA Improved grassland	GA1 Improved agricultural grassland
	GS Semi-natural grassland	GS1 Dry calcareous and neutral grassland
		GS2 Dry meadows and grassy verges
		GS3 Dry-humid acid grassland
		GS4 Wet grassland
	GM Freshwater marsh	GM1 Marsh
	GA Improved grassland	GA2 Amenity grassland (improved)
H Heath and dense bracken	HH Heath	HH1 Dry siliceous heath
		HH2 Dry calcareous heath
		HH3 Wet heath
		HH4 Montane heath
	HD Dense bracken	HD1 Dense bracken
P Peatlands	PB Bogs	PB1 Raised bogs
		PB2 Upland blanket bog
		PB3 Lowland blanket bog
		PB4 Cutover bog
		PB5 Eroding blanket bog
	PF Fens and Flushes	PF1 Rich fen and flush
		PF2 Poor fen and flush
		PF3 Transition mire and quaking bog
W Woodland and scrub	WN Semi-natural woodland	WN1 Oak-birch-holly woodland
		WN2 Oak-ash-hazel woodland
		WN3 Yew woodland
		WN4 Wet pedunculate oak-ash woodland
		WN5 Riparian woodland
		WN6 Wet willow-alder-ash woodland
		WN7 Bog woodland
	WD Highly modified/non-native	WD1 (Mixed) broad-leaved woodland
	woodland	WD2 Mixed broad-leaved/conifer woodland
		WD3 Yew woodland
		WD4 Conifer plantation
		WD5 Scattered trees and parkland
	WS Scrub/transitional woodland	WS1 Scrub
		WS2 Immature woodland
		WS3 Ornamental/non-native shrub
		WS4 Short rotation coppice
		WS5 Recently-felled woodland
	WL Linear woodland/scrub	WL1 Hedgerows
		WL2 Tree-lines
E Exposed rock and	ER Exposed rock	ER1 Exposed siliceous rock
disturbed ground		ER2 Exposed calcareous rock
		ER3 Siliceous scree and loose rock
		ER4 Calcareous scree and loose rock
	EU Underground rock and caves	EU1 Non-marine caves
		EU2 Artificial underground habitats
	ED Disturbed ground	ED1 Exposed sand, gravel or till
		ED2 Spoil and bare ground
		ED3 Re-colonising bare ground
		ED4 Active quarries and mines
		ED5 Refuse and other waste
B Cultivated and built land	BC Cultivated land	BC1 Arable crops
		BC2 Horticultural land
		BC3 Tilled land
		BC4 Flower beds and borders
	BL Built land	BL1 Stone walls and other stonework
		BL2 Earth banks
		BL3 Buildings and artificial surfaces
C Coastland	CS Sea cliffs and islets	CS1 Rocky sea cliffs
		CS2 Sea stacks and islets
		CS3 Sedimentary sea cliffs
	CW Brackish waters	CW1 Lagoons and saline lakes
		CW2 Tidal rivers
	CM Salt marshes	CM1 Lower salt marsh
		CM2 Upper salt march
	CB Shingle and gravel banks	CB1 Shingle and gravel banks
	CD Sand dune systems	CD1 Embryonic dunes
		CD2 Marram dunes
		CD3 Fixed dunes
		CD4 Dune scrub and woodland
		CD5 Dune slacks
		CD6 Machair
	CC Coastal constructions	CC1 Sea walls, piers and jetties
		CC2 Fish cages and rafts
L Littoral (intertidal)	LR Littoral rock	LR1 Exposed rocky shores
		LR2 Moderately exposed rocky shores
		LR3 Sheltered rocky shores
		LR4 Mixed substrata shores
		LR5 Sea caves
	LS Littoral sediment	LS1 Shingle and gravel shores
		LS2 Sand shores
		LS3 Muddy sand shores
		LS4 Mud shores
		LS5 Mixed sediment shores
S Sub-littoral shores	SR Sub-littoral rock	SR1 Exposed infra-littoral rock
(sub-tidal)		SR2 Moderately exposed infra-littoral rock
		SR3 Sheltered infra-littoral rock
		SR4 Exposed circa-littoral rock
		SR5 Moderately exposed circa-littoral rock
		SR6 Sheltered circa-littoral rock
	SS Sub-littoral sediment	SS1 Infra-littoral gravels and sands
		SS2 Infra-littoral muddy sands
		SS3 Infra-littoral muds
		SS4 Infra-littoral mixed sediments
		SS5 Circa-littoral gravels and sands
		SS6 Circa-littoral muddy sands
		SS7 Circa-littoral muds
		SS8 Circa-littoral mixed sediments
M Marine water body		MW1 Open marine water
		MW2 Sea inlets and bays
		MW3 Straits and sounds
		MW4 Estuaries

## Sheet: CLC Fossitt IUCN crosswalk
CORINE Landcover Classification (includes those CLC classes recorded in the Dargle)				Irish National Typology		Dargle case-study	IUCN Global Ecosystem Typology
Class	Sub-Class	Code	Landcover Description	Level 1	Level 2	Ecosystem Type	Realm	Biome	Ecosystem Functional Group
1. Artificial Surfaces	1.1 Urban Fabric	111	Continuous Urban Fabric	B Cultivated and built land	BL Built land	Urban	Terrestrial	T7 Intensive land-use	T7.4 Urban and industrial ecosystems
		112	Discontinuous Urban Fabric	B Cultivated and built land	BL Built land			T7 Intensive land-use	T7.4 Urban and industrial ecosystems
	1.2 Industrial, Commercial and Transport Units	121	Industrial or commercial units	B Cultivated and built land	BL Built land			T7 Intensive land-use	T7.4 Urban and industrial ecosystems
		122	Road and Rail Network and Associated land	B Cultivated and built land	BL Built land			T7 Intensive land-use	T7.4 Urban and industrial ecosystems
	1.3 Mine, Dump and Construction Sites	131	Mineral extraction sites	B Cultivated and built land	BL Built land			T7 Intensive land-use	T7.4 Urban and industrial ecosystems
		132	Dump Sites	B Cultivated and built land	BL Built land			T7 Intensive land-use	T7.4 Urban and industrial ecosystems
		133	Construction sites	B Cultivated and built land	BL Built land			T7 Intensive land-use	T7.4 Urban and industrial ecosystems
	1.4 Artificial, Non-Agricultural Vegetated Areas	141	Green urban areas	G Grassland and Marsh	GA Improved grassland			T7 Intensive land-use	T7.4 Urban and industrial ecosystems
		142	Sports and leisure facilities	B Cultivated and built land	BC Cultivated land			T7 Intensive land-use	T7.4 Urban and industrial ecosystems
2. Agricultural Areas	2.1 Arable Land	211	Non-Irrigated Arable Land	B Cultivated and built land	BC Cultivated land	Cropland		T7 Intensive land-use	T7.1 Annual croplands
	2.3 Pastures	231	Pastures	G Grassland and Marsh		Grasslands		T7 Intensive land-use	T7.2 Sown pastures and fields
	2.4 Heterogeneous Agricultural Areas	241	Complex Cultivation Patterns	G Grassland and Marsh				T7 Intensive land-use	T7.2 Sown pastures and fields
		243	Land Principally Occupied by Agriculture, with significant areas of Natural Vegetation	G Grassland and Marsh				T7 Intensive land-use	T7.5 Derived semi-natural pastures and old fields
		321	Natural Grassland	G Grassland and Marsh				T7 Intensive land-use	T7.5 Derived semi-natural pastures and old fields
3. Forest and Seminatural Areas	3.1 Forests	311	Broad-Leaved Forest	W Woodland and scrub	WD Highly modified/non-native woodland	Forest		T7 Intensive land-use	T7.3 Plantations
		312	Coniferous Forest	W Woodland and scrub				T7 Intensive land-use	T7.3 Plantations
		313	Mixed Forest	W Woodland and scrub				T7 Intensive land-use	T7.3 Plantations
		324	Transitional Woodland Shrub	W Woodland and scrub	WS Scrub/transitional woodland			T7 Intensive land-use	T7.3 Plantations
			n/a	W Woodland and scrub	WN Semi-natural woodland	Woodlands		T2 Temperate–boreal forests & woodlands	T2.2 Deciduous temperate forests
			n/a	W Woodland and scrub	WL Linear woodland/scrub			T7 Intensive land-use	T7.5 Derived semi-natural pastures and old fields
	3.2Shrub and/or Herbaceous Vegetation Associations	322	Moors and Heathland	H Heath and dense bracken	HH Heath	Heathlands		T3 Shrublands & shrubby woodlands	T3.3 Cool temperate heathlands
	3.3 Open Spaces with Little or no Vegetation	334	Burnt Areas	H Heath and dense bracken	HH Heath			T3 Shrublands & shrubby woodlands	T3.3 Cool temperate heathlands
		333	Sparsely Vegetated Areas	E Exposed rock and disturbed ground	ER Exposed rock			T3 Shrublands & shrubby woodlands	T3.4 Rocky pavements, lava flows and screes
4. Wetlands	4.1 Inland Wetlands	412	Peat Bogs	P Peatlands	PB Bogs	Peatlands	Freshwater-Terrestrial	TF1 Palustrine wetlands	TF1.6 Boreal, temperate and montane peat bogs; TF1.7 Boreal and temperate fens
5. Water bodies	5.1 Inland Waters	512	Water Bodies	F Freshwater	FL Lakes and Ponds	Freshwater	Freshwater	F1 Rivers and streams; F2 Lakes	F1.1 Permanent upland streams; F1.2 Permanent lowland rivers; F2.2 Small permanent freshwater lakes
	5.2 Marine Waters	523	Sea and Ocean	C Coastland	CD Sand dune systems	Coastal	Marine-Terrestrial	MT1 Shoreline systems; MT2 Supralittoral coastal systems	MT 1.2 Muddy shorelines; MT 2.1 Coastal shrublands and grasslands
